# Supplementary material
Source: PubMed Central journal article supplement (PMC5656043)
Supplement: NIHMS901066-supplement-1.pdf [file NIHMS901066-supplement-1.pdf]

## Supplemental Figure S1

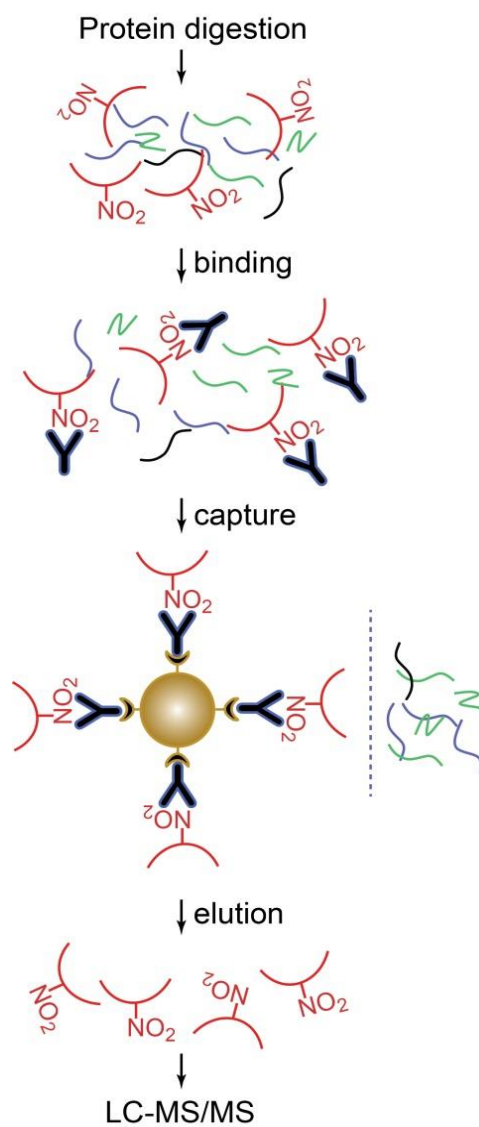

Figure S1. Schematic diagram of antibody-based enrichment of nitrotyrosine-containing peptides.

## Supplemental Figure S2

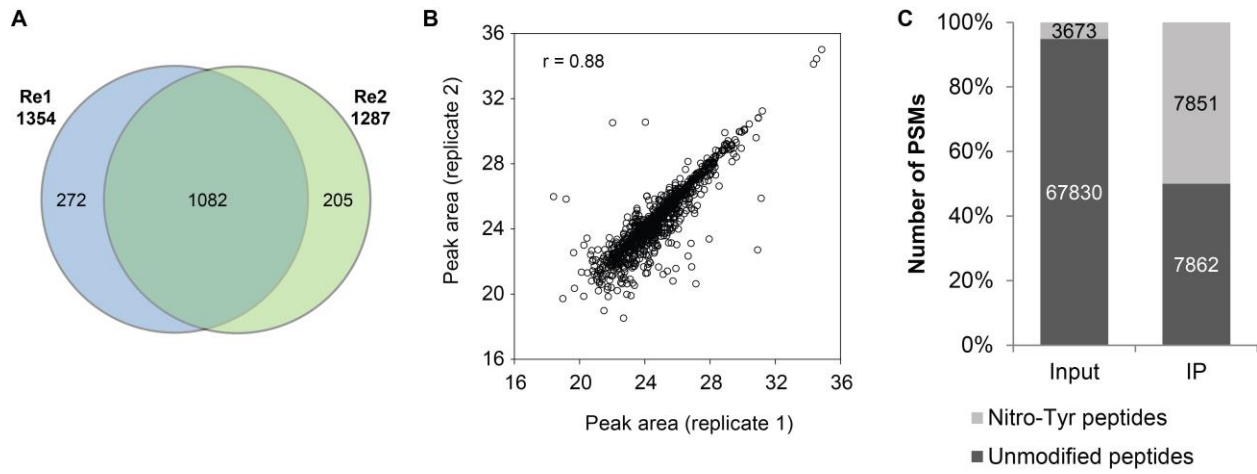

Figure S2. Enrichment of nitrotyrosine peptides from whole cell lysate of A549 cells. The cell extract was first *in vitro* nitrated, the proteins were digested and the peptides were subjected for MS analysis before and after anti-nitrotyrosine antibody enrichment. (A) Overlap of identified nitrotyrosine peptides from two replicates of IP enriched fraction. (B) Scatter plots of the correlation of the abundance of nitrotyrosine peptides between replicates. (C) The number of PSMs for non-nitrated peptides (black) and nitrotyrosine peptides (grey) identified from input and IP fraction.

**m**

Supplemental Figure S3

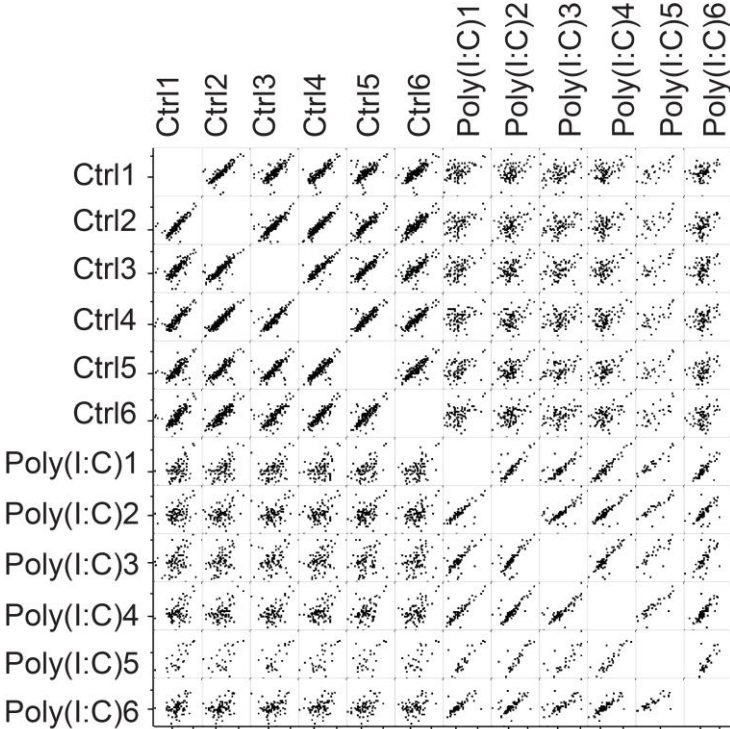

**Figure S3** Multiple scatter plots of the correlation of the abundance of nitrotyrosine peptides between replicates.

**Supplemental Table S3.** The non-nitrated BSA peptides identified from LC-MS/MS analysis of tryptic digest of BSA (Input) and IP fraction from anti-nitrotyrosine antibody enrichment. The non-nitrated BSA peptides identified from input and IP fraction were consolidated in the table. The number of PMS of each peptide identified from each sample were tabulated. PSM, peptide spectrum match; IP, immunoprecipitation.

| Sequence     | # of PSMs |    | Sequence                      | # of PSMs |    |
|--------------|-----------|----|-------------------------------|-----------|----|
|              | Input     | IP |                               | Input     | IP |
| ATEEQLK      | 3         | 0  | YICDNQDTISSK                  | 18        | 0  |
| CCAADDK      | 2         | 0  | DAFLGSFLYEYSR                 | 26        | 0  |
| LCVLHEK      | 14        | 0  | DDPHACYSTVFDK                 | 35        | 0  |
| LVTDLTK      | 4         | 0  | LGEYGFQNALIVR                 | 1         | 0  |
| YIYEIAR      | 42        | 4  | LKPDPTLCDEFK                  | 37        | 0  |
| AEFVEVTK     | 75        | 1  | QEPERNECFLSHK                 | 1         | 0  |
| DDSPDLPK     | 71        | 0  | TCVADESHAGCEK                 | 29        | 7  |
| DLGEEHFK     | 30        | 0  | ECCHGDLLECADDR                | 21        | 0  |
| NECFLSHK     | 25        | 0  | MPCTEDYLSLILNR                | 26        | 0  |
| QNCDQFEK     | 1         | 0  | VPQVSTPTLVEVSR                | 48        | 0  |
| CCTESLVNR    | 25        | 1  | YNGVFQECCQAEDK                | 1         | 0  |
| QTALVELLK    | 19        | 0  | HPYFYAPPELLYYANK              | 14        | 3  |
| SHCIAEVEK    | 16        | 1  | KVPQVSTPTLVEVSR               | 41        | 2  |
| DVCKNYQEAK   | 3         | 0  | LFTFHADICTLPDTEK              | 118       | 2  |
| EACFAVEGPK   | 36        | 2  | NECFLSHKDDSPDLPK              | 1         | 0  |
| ECCDKPLLEK   | 49        | 0  | RHPYFYAPPELLYYANK             | 4         | 0  |
| KQTALVELLK   | 4         | 0  | RPCFSALTPDETYVPK              | 46        | 0  |
| LVNELTEFAK   | 5         | 0  | CCAADDKEACFAVEGPK             | 9         | 0  |
| FPKAEFVEVTK  | 2         | 0  | VHKECCHGDLLECADDR             | 6         | 0  |
| HLVDEPQNLIK  | 39        | 1  | DAIPENLPPLTADFAEDK            | 120       | 0  |
| HPEYAVSVLLR  | 29        | 5  | HLVDEPQNLIKQNCDQFEK           | 1         | 0  |
| ETYGDMADCCEK | 18        | 0  | TVMENFVAFVDKCCAADDK           | 14        | 0  |
| EYEATLEECCA  | 24        | 0  | GLVLIAFSQYLQQCPFDEHVK         | 15        | 0  |
| LKECCDKPLLEK | 8         | 0  | DAIPENLPPLTADFAEDKDVCK        | 6         | 0  |
| RHPEYAVSVLLR | 46        | 1  | EYEATLEECCA                   | 4         | 0  |
| SLHTLFGDELCK | 38        | 5  | DDPHACYSTVFDK                 | 4         | 0  |
| TVMENFVAFVDK | 54        | 10 | DAIPENLPPLTADFAEDKDVCKNYQEAK  | 4         | 0  |
| VTKCCTESLVNR | 7         | 0  | TVMENFVAFVDKCCAADDKEACFAVEGPK | 5         | 0  |
